# Supplementary material for: Occupational pesticide exposure increases risk of acute myeloid leukemia: a meta-analysis of case–control studies including 3,955 cases and 9,948 controls
Source: PubMed Central journal article supplement (PMC7820275; doi:10.1038/s41598-021-81604-x), 2021-01-21
Supplement: 41598_2021_81604_MOESM4_ESM.pdf [file 41598_2021_81604_MOESM4_ESM.pdf]

# Occupational pesticide exposure increases risk of acute myeloid leukemia: a meta-analysis of case-control studies including 3,955 cases and 9,948 controls

Amelie Foucault, Nicolas Vallet, Noemie Ravalet, Frédéric Picou, Marie C Bene, Emmanuel Gyan, and Olivier Herault

## SUPPLEMENTARY METHODS

---

Literature search strategy

Extracted data

## SUPPLEMENTARY TABLES AND FIGURES

---

**Table S1.** Classification of risk of bias used in this meta-analysis.

**Table S2.** Details on exposure assessment in included studies.

**Table S3.** Details on acute myeloid leukemia (AML) patients and control sources.

**Table S4.** Detailed Newcastle-Ottawa scale evaluation for studies included in the meta-analysis.

**Table S5.** Reported funding of included studies.

**Table S6.** Variables included in the final model from the seven studies reporting adjusted odds ratios.

**Table S7.** Sensitivity analysis including results from the study of Bassig *et al.*

**Table S8.** Stratified pooled odds ratio of the relationship between pesticide exposure and risk of acute myeloid leukemia.

**Fig S1.** Inclusion periods and date of publication of included studies in the meta-analysis.

**Fig S2.** Graphical representation of inclusion age heterogeneity between included studies.

**Fig S3.** Bias assessment within each study.

**Fig S4.** Outlier studies identification with Q-Q plot.

**Fig S5.** Frequency of acute myeloid leukemia over time together with pesticide usage in the USA.

## **SUPPLEMENTARY METHODS**

### **Literature search strategy**

The following search strategies were used: (i) “(acute myeloid leukemia OR myeloid leukemia OR AML OR acute leukaemia) AND (pesticide OR herbicide OR rodenticide OR insecticide OR fungicide OR repellent OR pest)”; (ii) “(acute myeloid leukemia OR myeloid leukemia OR AML OR acute leukaemia) AND (chemicals OR solvents OR organochlorine OR alachlor OR propachlor OR halogenated hydrocarbon OR benzene)”; (iii) “(acute myeloid leukemia OR myeloid leukemia OR AML OR acute leukaemia) AND (occupation OR farmers OR agriculture OR rural)”. To focus on adult populations, for every search we added “NOT (child OR childhood OR children OR infant)”. The spelling “leukaemia” was also used to increase the number of screened references. No language restrictions were placed within the search strategy but only English-language publications were ultimately retained. The references extracted were compared to those of the previously published meta-analysis<sup>18</sup>.

### **Extracted data**

The following data were extracted: study quality score (see below), inclusion period, age of included AML patients, country of origin, source of AML patients, source of controls, number of total and exposed AML patients and controls, matching covariates, unadjusted OR, adjusted OR, covariates of adjustment, methods for exposure assessment, pesticides definition, reported funding. Alternative OR for different exposure intensities were also extracted. These items were used for the stratified analysis.

**Table S1. Classification of risk of bias used in this meta-analysis.**

|                            |                                            | Low                                                        | Unclear                                                                                              | High                                                  |
|----------------------------|--------------------------------------------|------------------------------------------------------------|------------------------------------------------------------------------------------------------------|-------------------------------------------------------|
| <b>Cases (AML)</b>         | <b>Cases source</b>                        | Multicentric                                               | -                                                                                                    | Monocentric                                           |
|                            | <b>AML method</b>                          | WHO or FAB criteria                                        | reviewed by experts                                                                                  | ICD, other or not specified                           |
|                            | <b>AML subtype identification</b>          | AML subtype defined with cytogenetic or molecular findings | AML only defined as de novo, secondary or therapy related                                            | other or not specified                                |
| <b>Control (non AML)</b>   | <b>Source</b>                              | population                                                 | -                                                                                                    | hospital                                              |
|                            | <b>AML diagnosis exclusion in controls</b> | exclusion AML diagnosis                                    | -                                                                                                    | no information on AML diagnosis exclusion             |
| <b>Exposure assessment</b> | <b>Pesticide definition</b>                | clear definition with identified molecules                 | at least one usage or type of pesticides stated in the manuscript (insecticides, rodenticides, etc.) | pesticide definition not specified                    |
|                            | <b>Type of questionnaire</b>               | peer to peer interviews                                    | -                                                                                                    | other or not specified                                |
|                            | <b>Probability of exposure evaluation</b>  | use of job exposure matrix                                 | expert review                                                                                        | other or not specified                                |
|                            | <b>Intensity of pesticide exposure</b>     | described                                                  | not clear                                                                                            | not specified                                         |
| <b>Cofounding factors</b>  | <b>Matching</b>                            | matched gender and age                                     | matched gender or age                                                                                | other or not specified                                |
|                            | <b>Adjustment</b>                          | adjusted studies                                           | -                                                                                                    | no adjustment or not specified                        |
| <b>Funding</b>             |                                            | no direct relation with pesticides industry                | -                                                                                                    | relationship with industries or funding not specified |

WHO: world health organization; FAB: French-American-British; ICD: international classification of diseases; AML: acute myeloid leukemia

**Table S2. Details on exposure assessment in included studies.**

| First author and reference   | Keywords used for the report or assessment of OPE | Additional tool to evaluate the probability of exposure | Source of exposure definition                                                                                                                                                                        | Metrics of exposure measurement                                                                                                                                              | Lookback time prior to diagnosis | Participation fractions for cases | Participation fractions for controls |
|------------------------------|---------------------------------------------------|---------------------------------------------------------|------------------------------------------------------------------------------------------------------------------------------------------------------------------------------------------------------|------------------------------------------------------------------------------------------------------------------------------------------------------------------------------|----------------------------------|-----------------------------------|--------------------------------------|
| Flodin, U. <sup>33</sup>     | Pesticides (not otherwise specified)              | NS                                                      | Mailed questionnaire                                                                                                                                                                                 | NS                                                                                                                                                                           | NS                               | 100%                              | 90.8%                                |
| Richardson, S. <sup>34</sup> | Pesticides, insecticides, weed killers            | Expert review                                           | Detailed questionnaire following a standardized interview and assessed by a professional                                                                                                             | high (>50% of the working time), medium (5-50%) exposure and low (<5%)                                                                                                       | NS                               | 72%                               | 95%                                  |
| Crane, M.M. <sup>35</sup>    | Pesticides (not otherwise specified)              | Expert review                                           | Interview by one of the first two authors using a questionnaire                                                                                                                                      | NS                                                                                                                                                                           | NS                               | 98%                               | 100%                                 |
| Ciccone, G. <sup>36</sup>    | Pesticides (not otherwise specified)              | 4 levels probability by expert review                   | Questionnaire collected broad range of possible risk factors in addition to solvent exposure. The descriptions of the participants' tasks were then categorized in terms of their potential exposure | 1) not exposed; 2) exposed to some of the agents listed, but not to the one under investigation; 3) "possibly" exposed (low probability of exposure) ; 4) "probably" exposed | NS                               | 91%                               | 99% hospital<br>82% population       |
| Mele, A. <sup>37</sup>       | Pesticides, herbicides                            | NS                                                      | Interviews following a questionnaire pilot-tested in a small sample                                                                                                                                  | Several occupations described: agricultural workers, professional use of herbicides, professional use of pesticides, greenhouse workers                                      | NS                               | 99.6%                             | 100%                                 |
| Albin, M. <sup>38</sup>      | Pesticides (not otherwise specified)              | Expert review                                           | Telephone interviews obtained by a professional                                                                                                                                                      | NS                                                                                                                                                                           | NS                               | 90%                               | 72%                                  |

|                             |                                                                                                                                                                                                                                               |                                          |                                                                                                                                                                                           |                                                                                                                                                     |                                                                              |       |      |
|-----------------------------|-----------------------------------------------------------------------------------------------------------------------------------------------------------------------------------------------------------------------------------------------|------------------------------------------|-------------------------------------------------------------------------------------------------------------------------------------------------------------------------------------------|-----------------------------------------------------------------------------------------------------------------------------------------------------|------------------------------------------------------------------------------|-------|------|
| Lazarov, D. <sup>39</sup>   | Pesticides (not otherwise specified)                                                                                                                                                                                                          | 3 levels probability by expert review    | Questionnaire collecting occupational history, coded blindly according the Classification of the Italian Institute of Statistic and interpreted by a professional                         | 1) not exposed; 2) 50-74% chance that exposure occurred; 3) >75%                                                                                    | <10 years (25 cases/controls<br>11-20 (10/22)<br>21-30 (7/27)<br>>31 (27/37) | 89%   | 100% |
| Adegoke, O.J. <sup>40</sup> | Pesticides (not otherwise specified)                                                                                                                                                                                                          | JEM: Mustafa Dosemeci's NCI for Shanghai | Interviews by trained interviewers using standardized Chinese questionnaires; self-reported information combined with job-exposure matrix assessment. Based on jobs held 3 years or more. | Duration of exposure: never, ever, < 10 years, ≥ 10 years + JEM (probability of exposure none, low, medium, high)                                   | NS                                                                           | 91.4% | 94%  |
| Terry, P.D. <sup>41</sup>   | Pesticides, insecticides and/or rodenticides                                                                                                                                                                                                  | NS                                       | Self- and proxy-interviews allowing classification of individuals as having been employed or not in an occupational category potentially associated with leukemia risk                    | Duration of employment at occupation: ever, never, ≥ 1 year, and duration of participation in hobby: never, ever, up to five years, 5+ years        | NS                                                                           | 84%   | 66%  |
| Kaufman, D.W. <sup>42</sup> | Gramoxone, huama herbicide; carbaryl; methyl parathion, glyphosate; trichlorofon, methylamidophos, paris green, dimethoate, dichlorvos/propoxur/cyfluthrin, DDT, spark, unspecified pesticide, unspecified herbicide, unspecified rodenticide | NS                                       | Interview conducted by trained professional                                                                                                                                               | Details were described (1) median of duration of use (2) median lifetime pesticide days (3) non occupational pesticide (4) pesticide used near home | NS                                                                           | 100%  | 100% |

|                             |                                                                      |                            |                                                                                                       |                                                                                                              |    |     |      |
|-----------------------------|----------------------------------------------------------------------|----------------------------|-------------------------------------------------------------------------------------------------------|--------------------------------------------------------------------------------------------------------------|----|-----|------|
| Wong, O. <sup>43</sup>      | Pesticides, herbicides and fertilizers                               | Committee of local experts | Interview by trained professional                                                                     | Dichotomous classification of "ever/never"                                                                   | NS | 97% | 100% |
| Strom, S.S. <sup>44</sup>   | Pesticides, herbicides and fertilizers                               | JEM: NCI                   | Interview and proxy-interview                                                                         | The Job-Exposure Matrix was used to determine an intensity level of exposure: none, low, moderate, and high. | NS | 87% | 77%  |
| Parodi, S. <sup>45</sup>    | Pesticides (not otherwise specified)                                 | NS                         | Interview through a standardized questionnaire by trained interviewers to obtain detailed information | Exposed, not exposed                                                                                         | NS | 88% | 81%  |
| Poynter, J.N. <sup>46</sup> | List of specific insecticides, herbicides, fungicides and fumigants. | NS                         | A self-administered questionnaire                                                                     | Duration of exposure 1) <1-10 years 2) >10 years                                                             | NS | 58% | 64%  |

JEM: job-exposure matrix; OPE: occupational pesticides exposure; NCI: National Cancer Institute (Dosemeci *et al. Epidemiology.* **5**, 124-127 (1994)); ALOHA: job-exposure matrix for chronic obstructive pulmonary diseases (Sunyer, *et al. Am J Respir Crit Care Med.* **157**, 512-517 (1998)); NS: not specified.

**Table S3. Details on acute myeloid leukemia (AML) patients and control sources.**

| First author                 | AML source   |                                                                                                                                                               | Controls source         |                                                                                                                                                                                                                                                                                      |
|------------------------------|--------------|---------------------------------------------------------------------------------------------------------------------------------------------------------------|-------------------------|--------------------------------------------------------------------------------------------------------------------------------------------------------------------------------------------------------------------------------------------------------------------------------------|
| Flodin, U. <sup>33</sup>     | Multicentric | Patients from the hospitals of Linköping, Norrköping, Örebro and Umeå and the cytological department of the hospital of Jönköping in Sweden                   | Population              | Two series of referents were used (1) controls were identified through a general population register matched for gender, age and dwellings (2) randomly from the same general population register of the catchment areas of the hospital, ages and the number of individuals totaled |
| Richardson, S. <sup>34</sup> | Multicentric | Patients from the clinical department of hematology at Hotel-Dieu, Paris, or in the department of hematology of Hospital Henri-Mondor in Creteil, near Paris. | Hospital                | Controls were identified among hospitalized patients in other departments of the same hospitals                                                                                                                                                                                      |
| Crane, M.M. <sup>35</sup>    | Multicentric | Patients from Texas Medical Centers: Methodist, St. Luke's, Ben Taub, M.D. Anderson Cancer Center                                                             | Hospital                | Located from admission printouts of participating hospitals                                                                                                                                                                                                                          |
| Ciccone, G. <sup>36</sup>    | Monocentric  | Patients from main hospital of Torino                                                                                                                         | Hospital and population | Two groups of controls were recruited (1) at hospital with no hematological or cancer diseases (including diseases of the digestive system, endocrine conditions and hypertension and CHD) (2) a random sample of the population living in the city of Torino                        |
| Mele, A. <sup>37</sup>       | Multicentric | Patients from hospitals in Rome, Bologna and Pavia                                                                                                            | Hospital                | Controls were identified among out-patients seen in the same hematology departments, without a hematologic disorder, and among those with no cancer disorders seen in the same hospitals                                                                                             |
| Albin, M. <sup>38</sup>      | Multicentric | Patients from Lund and Helsingborg                                                                                                                            | Population              | Statistics Sweden selected 3 referents for each case. One referent in each matched set was randomly selected to be interviewed. When referents or their next-of kin could not be interviewed, other referents from the matched set were selected                                     |
| Lazarov, D. <sup>39</sup>    | Multicentric | Patients from two north west London Hospitals and the Haematology Department in Novi Sad, Yugoslavia                                                          | Hospital                | Controls were identified among in-patients in the hospital from which the cases were recruited                                                                                                                                                                                       |
| Adegoke, O.J. <sup>40</sup>  | Multicentric | Shanghai Cancer Registry which is composed of residents of urban Shanghai diagnosed with leukemia                                                             | Population              | Controls were randomly identified from the general urban Shanghai population                                                                                                                                                                                                         |
| Terry, P.D. <sup>41</sup>    | Multicentric | Cancer and Leukemia Group B (CALGB), a multi-institutional cooperative cancer treatment group in the USA                                                      | Population              | Controls were identified through a two-stage random digit dialing procedure                                                                                                                                                                                                          |

|                             |              |                                                                                                                                                                    |            |                                                                                                                         |
|-----------------------------|--------------|--------------------------------------------------------------------------------------------------------------------------------------------------------------------|------------|-------------------------------------------------------------------------------------------------------------------------|
| Kaufman, D.W. <sup>42</sup> | Monocentric  | Patients from Siriraj Hospital (Bangkok)                                                                                                                           | Hospital   | Controls were identified at Siriraj Hospital with diagnoses considered generally unrelated to the exposures of interest |
| Wong, O. <sup>43</sup>      | Multicentric | Patients from 29 participating hospitals in Shanghai                                                                                                               | Hospital   | Controls were randomly identified from patients admitted to the same hospital                                           |
| Strom, S.S. <sup>44</sup>   | Monocentric  | Patients from University of Texas M. D. Anderson Cancer Center                                                                                                     | Population | Control were randomly identified without previous history of cancer in Texas population                                 |
| Parodi, S. <sup>45</sup>    | Multicentric | Patients from 11 areas in Italy: namely, provinces of Varese, Forli, Siena, Latina, Ragusa, Imperia, Florence, Novara, Vercelli, and Verona plus the town of Turin | Population | Controls were identified by random sampling of the resident population                                                  |
| Poynter, J.N. <sup>46</sup> | Multicentric | Patients from Minnesota Cancer Surveillance System                                                                                                                 | Population | Controls were identified through the Minnesota State driver's license/identification card list                          |



**Table S4. Detailed Newcastle-Ottawa scale evaluation for studies included in the meta-analysis.**

| First author and reference   | Selection of cases and controls |                          |                   |                    | Comparability              | Exposure assessment       |                                    |                   | Total |
|------------------------------|---------------------------------|--------------------------|-------------------|--------------------|----------------------------|---------------------------|------------------------------------|-------------------|-------|
|                              | Cases definition                | Cases representativeness | Control selection | Control definition | Matched for age and gender | Ascertainment of exposure | Same method for cases and controls | Non-response rate |       |
| Flodin, U. <sup>33</sup>     | 0                               | 0                        | 1                 | 0                  | 2                          | 0                         | 1                                  | 0                 | 4     |
| Richardson, S. <sup>34</sup> | 1                               | 1                        | 0                 | 1                  | 2                          | 1                         | 1                                  | 1                 | 8     |
| Crane, M.M. <sup>35</sup>    | 1                               | 1                        | 0                 | 1                  | 2                          | 0                         | 1                                  | 1                 | 7     |
| Cicccone, G. <sup>36</sup>   | 1                               | 1                        | 0                 | 0                  | 2                          | 0                         | 1                                  | 1                 | 6     |
| Mele, A. <sup>37</sup>       | 1                               | 1                        | 0                 | 1                  | 0                          | 0                         | 1                                  | 0                 | 4     |
| Albin, M. <sup>38</sup>      | 1                               | 1                        | 1                 | 0                  | 2                          | 0                         | 1                                  | 0                 | 6     |
| Lazarov, D. <sup>39</sup>    | 1                               | 1                        | 0                 | 1                  | 2                          | 0                         | 1                                  | 1                 | 6     |
| Adegoke, O.J. <sup>40</sup>  | 0                               | 1                        | 1                 | 0                  | 2                          | 1                         | 1                                  | 0                 | 6     |
| Terry, P.D. <sup>41</sup>    | 1                               | 1                        | 1                 | 0                  | 2                          | 0                         | 1                                  | 0                 | 6     |
| Kaufman, D.W. <sup>42</sup>  | 1                               | 1                        | 0                 | 1                  | 2                          | 0                         | 1                                  | 1                 | 7     |
| Wong, O. <sup>43</sup>       | 1                               | 1                        | 0                 | 1                  | 2                          | 1                         | 1                                  | 1                 | 8     |
| Strom, S.S. <sup>44</sup>    | 1                               | 1                        | 1                 | 1                  | 2                          | 0                         | 1                                  | 1                 | 8     |
| Parodi, S. <sup>45</sup>     | 1                               | 1                        | 1                 | 0                  | 2                          | 0                         | 1                                  | 1                 | 7     |
| Poynter, J.N. <sup>46</sup>  | 1                               | 1                        | 1                 | 1                  | 1                          | 0                         | 1                                  | 0                 | 6     |

**Table S5. Reported funding of included studies.**

| <b>First author and reference</b> | <b>Funding</b>                                                                                                                                                                                                         |
|-----------------------------------|------------------------------------------------------------------------------------------------------------------------------------------------------------------------------------------------------------------------|
| Flodin, U. <sup>33</sup>          | Swedish Work Environment Funding                                                                                                                                                                                       |
| Richardson, S. <sup>34</sup>      | Inserm – Institut National de la Santé et de la Recherche Médicale                                                                                                                                                     |
| Crane, M.M. <sup>35</sup>         | NIH K07                                                                                                                                                                                                                |
| Ciccone, G. <sup>36</sup>         | EEC-Europe Against Cancer Programme, Associazione Italiana per le Ricerche sul Cancro                                                                                                                                  |
| Mele, A. <sup>37</sup>            | Italian Ministry of Health, grant 500.4/RSC/70.18/T/1886, and by the Consiglio Nazionale della Ricerche Bilateral Project Italia-USA, grants 87.00186.04, 88.00600.04, and 89.02995.04.                                |
| Albin, M. <sup>38</sup>           | Swedish Council for Work Life Research, Swedish Cancer Society, Medical Faculty of Lund University, Lund University Hospital, Gunnar, Arvid and Elisabeth Nilssons Research Foundation, and PREEM Research Foundation. |
| Lazarov, D. <sup>39</sup>         | NR                                                                                                                                                                                                                     |
| Adegoke, O.J. <sup>40</sup>       | Young Scientist Foundation, Chinese Ministry of Public Health; Grant (1U54-CA9140801) from the National Cancer Institute and National Institutes of Health.                                                            |
| Terry, P.D. <sup>41</sup>         | NR                                                                                                                                                                                                                     |
| Kaufman, D.W. <sup>42</sup>       | Thailand Research Fund, Commission on Higher Education.                                                                                                                                                                |
| Wong, O. <sup>43</sup>            | Benzene Health Effect Consortium, American Petroleum Institute                                                                                                                                                         |
| Strom, S.S. <sup>44</sup>         | NCI, National Institute of Environmental Health Sciences                                                                                                                                                               |
| Parodi, S. <sup>45</sup>          | NCI grant, Europe Against Cancer Programme, Lega Italiana per la Lotta contro I Tumori                                                                                                                                 |
| Poynter, J.N. <sup>46</sup>       | NCI R01                                                                                                                                                                                                                |

NR: not reported

**Table S6. Variables included in the final model from the seven studies reporting adjusted odds ratios.**

| First author and reference   | Age* | Gender* | Prior radiation or chemotherapy exposure* | Benzene and other solvent exposure* | Ethnicity | Geographical zones | Smoking | Education | Income | Other                                                                                            |
|------------------------------|------|---------|-------------------------------------------|-------------------------------------|-----------|--------------------|---------|-----------|--------|--------------------------------------------------------------------------------------------------|
| Richardson, S. <sup>34</sup> | X    | X       | X                                         |                                     | X         | X <sup>a</sup>     |         |           |        |                                                                                                  |
| Ciccione, G. <sup>36</sup>   | X    |         |                                           |                                     |           | X <sup>a,b</sup>   | X       |           |        |                                                                                                  |
| Mele, A. <sup>37</sup>       | X    | X       |                                           |                                     |           | X <sup>a</sup>     |         | X         |        | occupations                                                                                      |
| Adegoke, O.J. <sup>40</sup>  | X    | X       |                                           |                                     |           |                    |         |           | X      |                                                                                                  |
| Terry, P.D. <sup>41</sup>    | X    | X       |                                           |                                     | X         | X <sup>c</sup>     | X       | X         |        | proxy respondent                                                                                 |
| Kaufman, D.W. <sup>42</sup>  | X    | X       |                                           | X                                   |           | X <sup>a,d</sup>   |         |           | X      | use of cellphones, occupational and non-occupational pesticide exposure, working with powerlines |
| Poynter, J.N. <sup>46</sup>  | X    | X       | X                                         |                                     |           | X <sup>a,f</sup>   | X       |           | X      |                                                                                                  |

\* refer to well-known risk factors of acute myeloid leukemia (Deschler, B. and Lübbert, M. *Cancer*, **107**, 2099-2107 (2006))

<sup>a</sup> of residency, <sup>b</sup> of birth, <sup>c</sup> not detailed, <sup>d</sup> living near powerlines, pesticides used near the home, <sup>f</sup> living near a farm

**Table S7. Sensitivity analysis including results from the study of Bassig *et al.***

| Pesticide/metabolite              |                         | Meta-analysis OR | Lower 95%CI | Upper 95%CI | p-value |
|-----------------------------------|-------------------------|------------------|-------------|-------------|---------|
| <b>Tertile 2 versus tertile 1</b> | Oxychlorthane           | 1.51             | 1.10        | 2.07        | 0.01    |
|                                   | trans-Nonachlor         | 1.51             | 1.10        | 2.07        | 0.01    |
|                                   | Heptachlor epoxide      | 1.50             | 1.09        | 2.06        | 0.01    |
|                                   | p,p'-DDT                | 1.51             | 1.10        | 2.07        | 0.01    |
|                                   | p,p'-DDE                | 1.49             | 1.09        | 2.05        | 0.01    |
|                                   | o,p'-DDT                | 1.47             | 1.08        | 2.01        | 0.01    |
|                                   | Mirex                   | 1.51             | 1.10        | 2.08        | 0.01    |
|                                   | Hexachlorobenzene       | 1.44             | 1.05        | 1.97        | 0.02    |
|                                   | Dieldrin                | 1.51             | 1.10        | 2.07        | 0.01    |
|                                   | g-Hexachlorocyclohexane | 1.50             | 1.09        | 2.06        | 0.01    |
|                                   | b-Hexachlorocyclohexane | 1.48             | 1.08        | 2.03        | 0.01    |
| <b>Tertile 3 versus tertile 1</b> | Oxychlorthane           | 1.51             | 1.10        | 2.08        | 0.01    |
|                                   | trans-Nonachlor         | 1.51             | 1.10        | 2.07        | 0.01    |
|                                   | Heptachlor epoxide      | 1.51             | 1.10        | 2.08        | 0.01    |
|                                   | p,p'-DDT                | 1.51             | 1.10        | 2.08        | 0.01    |
|                                   | p,p'-DDE                | 1.51             | 1.10        | 2.07        | 0.01    |
|                                   | o,p'-DDT                | 1.50             | 1.09        | 2.06        | 0.01    |
|                                   | Mirex                   | 1.50             | 1.09        | 2.06        | 0.01    |
|                                   | Hexachlorobenzene       | 1.49             | 1.09        | 2.05        | 0.01    |
|                                   | Dieldrin                | 1.51             | 1.10        | 2.08        | 0.01    |
|                                   | g-Hexachlorocyclohexane | 1.47             | 1.07        | 2.02        | 0.01    |
|                                   | b-Hexachlorocyclohexane | 1.50             | 1.09        | 2.06        | 0.01    |

**Table S8. Stratified pooled odds ratio of the relationship between pesticide exposure and risk of acute myeloid leukemia.**

| Analyzed strata                             | No. studies                                 | No. AML      | No. controls | Reference number                   | Pooled OR [95%CI]                              | Heterogeneity tests:                          |               | Publication bias<br>Egger's test p-value |
|---------------------------------------------|---------------------------------------------|--------------|--------------|------------------------------------|------------------------------------------------|-----------------------------------------------|---------------|------------------------------------------|
|                                             |                                             |              |              |                                    |                                                | Q-test p-value (I <sup>2</sup> ) <sup>†</sup> |               |                                          |
| <b>Studies design</b>                       | <b>AML population</b>                       |              |              |                                    |                                                |                                               |               |                                          |
|                                             | Multicentric                                | 11           | 3,18         | 8,31                               | 32, 33, 34, 34, 37, 38, 39, 40, 41, 43, 45     | 1.16 [0.93-1.44]                              | 0.10 (38%)    | 0.55                                     |
|                                             | Monocentric                                 | 3            | 775          | 1,638                              | 36, 42, 44                                     | 4.25 [2.97-6.09]                              | 0.47 (0%)     | 0.84                                     |
|                                             | <b>Control population<sup>a</sup></b>       |              |              |                                    |                                                |                                               |               |                                          |
|                                             | Population-based                            | 7            | 2,532        | 5,572                              | 37, 38, 39, 40, 41, 43, 45                     | 1.34 [0.76-2.34]                              | <0.001 (85%)  | 0.82                                     |
|                                             | Hospital-based                              | 6            | 1,373        | 4,130                              | 32, 33, 34, 35, 42, 44                         | 1.55 [1.17-1.98]                              | 0.29 (20%)    | 0.62                                     |
|                                             | <b>Study quality</b>                        |              |              |                                    |                                                |                                               |               |                                          |
|                                             | NOS≤6                                       | 7            | 1,973        | 4,569                              | 36, 37, 40, 41, 43, 44, 45                     | 1.20 [0.82-1.74]                              | 0.04 (51%)    | 0.25                                     |
|                                             | NOS>6                                       | 7            | 1,982        | 5,379                              | 32, 33, 34, 35, 38, 39, 42                     | 1.80 [0.17-2.78]                              | <0.001 (80%)  | 0.75                                     |
|                                             | <b>Risk of bias<sup>b</sup></b>             |              |              |                                    |                                                |                                               |               |                                          |
| Unclear or high                             | 4                                           | 1,713        | 4,749        | 35, 36, 39, 41, 42, 43, 44, 45     | 1.24 [0.85-1.82]                               | 0.08 (45%)                                    | 0.51          |                                          |
| Low                                         | 6                                           | 2,242        | 5,199        | 32, 33, 34, 37, 38, 40             | 1.79 [1.07-2.97]                               | <0.001 (86%)                                  | 0.86          |                                          |
| <b>Pesticide exposure recording methods</b> | <b>Exposure assessment</b>                  |              |              |                                    |                                                |                                               |               |                                          |
|                                             | Other                                       | 2            | 464          | 1,702                              | 40, 45                                         | 0.92 [0.67-1.26]                              | 0.56 (0%)     | NA                                       |
|                                             | PTP                                         | 12           | 3,491        | 8,246                              | 32, 33, 34, 35, 36, 37, 38, 39, 41, 42, 43, 44 | 1.64 [1.15-2.33]                              | <0.001 (75%)  | 0.76                                     |
|                                             | <b>Job exposure matrix or expert review</b> |              |              |                                    |                                                |                                               |               |                                          |
|                                             | Yes                                         | 8            | 2,330        | 3,948                              | 33, 34, 35, 36, 37, 38, 41, 42                 | 1.82 [1.12-2.95]                              | <0.001 (76%)  | 0.55                                     |
| <b>Cofounding factors analysis</b>          | <b>Adjusted OR</b>                          |              |              |                                    |                                                |                                               |               |                                          |
|                                             | Yes                                         | 7            | 2,172        | 4,815                              | 33, 35, 38, 39, 41, 42, 45                     | 1.51 [0.95-2.40]                              | < 0.001 (81%) | 0.54                                     |
|                                             | No                                          | 7            | 1,783        | 5,133                              | 32, 34, 36, 37, 40, 43, 44                     | 1.52 [0.93-2.48]                              | 0.004 (67%)   | 0.32                                     |
| <b>Studied populations</b>                  | <b>Geographical zone</b>                    |              |              |                                    |                                                |                                               |               |                                          |
|                                             | Europe                                      | 7            | 1,208        | 4,595                              | 34, 36, 39, 41, 42, 44, 45                     | 1.25 [0.87-1.82]                              | 0.04 (53%)    | 0.26                                     |
|                                             | North America                               | 4            | 1,702        | 2,651                              | 35, 38, 40, 43                                 | 1.72 [0.55-5.43]                              | <0.001 (91%)  | 0.75                                     |
|                                             | Asia                                        | 3            | 1,045        | 2,702                              | 32, 33, 37                                     | 1.74 [1.32-2.30]                              | 0.33 (9%)     | 0.81                                     |
|                                             | <b>Inclusion periods</b>                    |              |              |                                    |                                                |                                               |               |                                          |
|                                             | Before 1995                                 | 10           | 2,103        | 5,764                              | 34, 35, 36, 39, 37, 41, 42, 43, 44, 45         | 1.23 [0.91-1.66]                              | 0.16 (31%)    | 0.53                                     |
|                                             | After 1995                                  | 4            | 1,852        | 4,184                              | 32, 33, 38, 40                                 | 2.03 [1.07-3.85]                              | <0.001 (92%)  | 0.41                                     |
|                                             | <b>AML</b>                                  |              |              |                                    |                                                |                                               |               |                                          |
| Other <sup>c</sup>                          | 9                                           | 2,483        | 7,507        | 33, 34, 35, 37, 39, 40, 41, 44, 45 | 1.13 [0.89-1.45]                               | 0.05 (50%)                                    | 0.46          |                                          |
| De novo                                     | 5                                           | 1,472        | 2,441        | 32, 36, 38, 42, 43                 | 2.81 [1.58-5.00]                               | 0.03 (62%)                                    | 0.18          |                                          |
| <b>Pesticide subtypes<sup>d</sup></b>       | <b>Herbicides</b>                           | 4            | 1,379        | 3,953                              | 33, 40, 44                                     | 1.18 [0.89-1.57]                              | 0.25 (26%)    | 0.41                                     |
|                                             | <b>Insecticides</b>                         | 3            | 876          | 1,957                              | 33, 34                                         | 1.47 [1.15-1.88]                              | 0.92 (0%)     | NA                                       |
|                                             | <b>Fumigants</b>                            | 2            | 1,127        | 2,792                              | 33, 40                                         | 1.52 [0.86-2.67]                              | 0.82 (0%)     | NA                                       |
| <b>All studies</b>                          | <b>14</b>                                   | <b>3,955</b> | <b>9,948</b> | <b>All included [33-46]</b>        | <b>1.51 [1.10-2.08]</b>                        | <b>&lt;0.001 (76%)</b>                        | <b>0.82</b>   |                                          |

Subgroups are in ascending order ordered according to their mean effects. <sup>a</sup> Cicconne *et al.*<sup>42</sup> not included: hospital- and population-based; <sup>b</sup> risk of bias classification was performed using correspondence analysis described in Fig S3 <sup>c</sup> Other: de novo status was not mentioned or 0.69% of secondary AML in Wong *et al.*<sup>19</sup>; <sup>d</sup> Only studies reporting specific pesticide exposure were included for this subset analysis. NOS: Newcastle-Ottawa scale; PTP: peer-to-peer interviews.

Fig S1. Inclusion periods and date of publication of studies included in the meta-analysis.

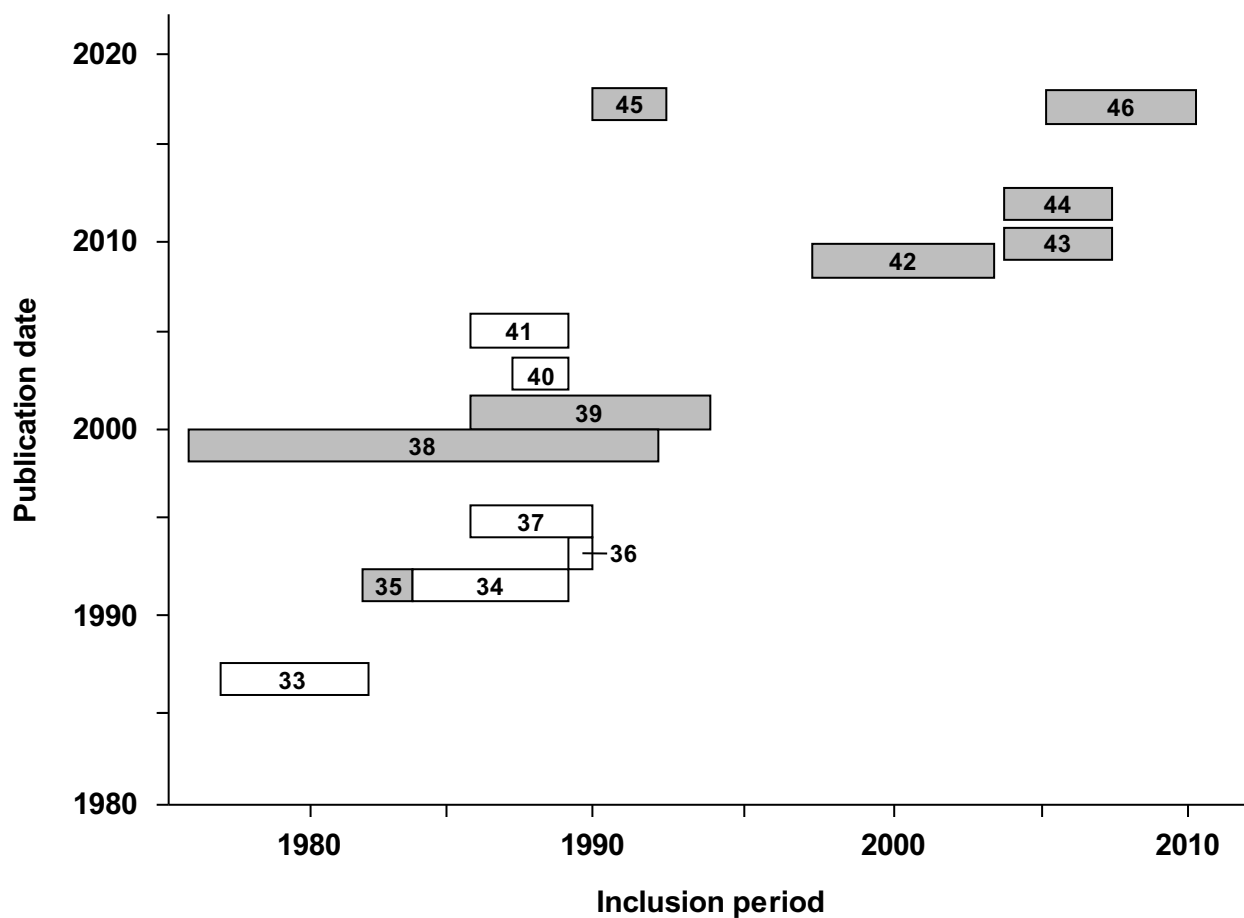

Studies are identified by their position in the reference list. White rectangles represent references included in the previous meta-analysis published in 2007<sup>18</sup>.

**Fig S2. Graphical representation of inclusion age heterogeneity between included studies.**

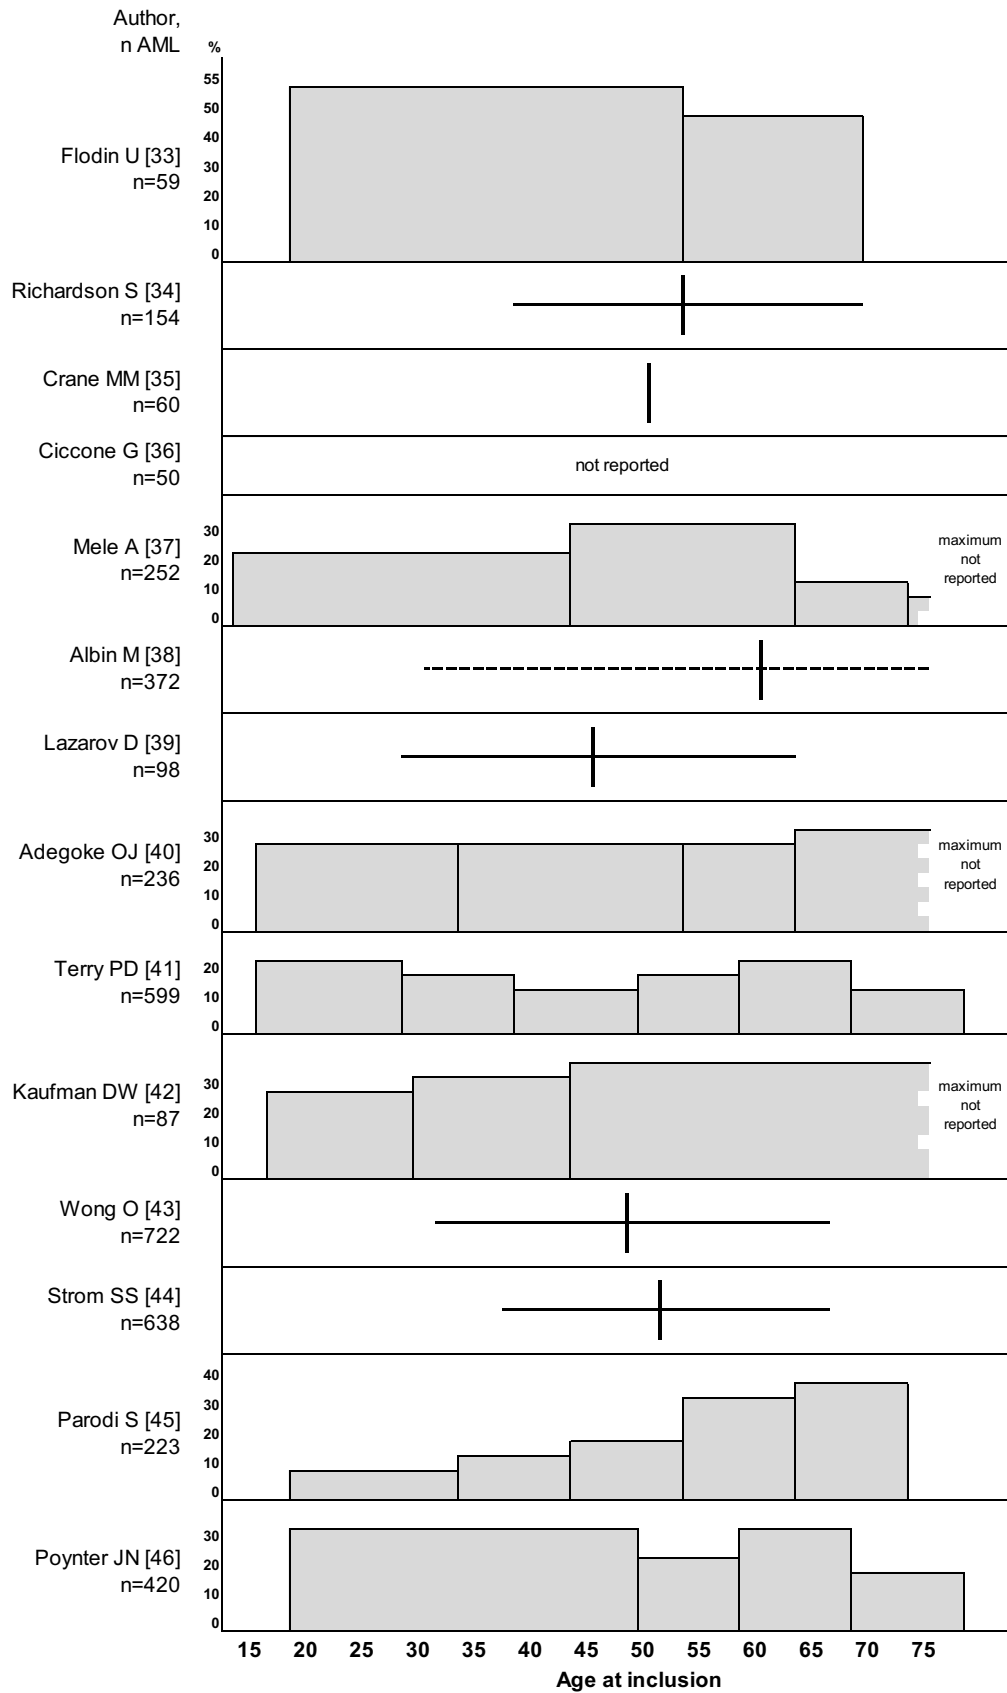

Bar plots represent the proportions of patients included. Vertical lines represent the mean and horizontal lines the standard deviation except for Albin 2000 where vertical and horizontal lines represent the median and 10-90% deciles.

**Fig S3. Bias assessment within each study.**

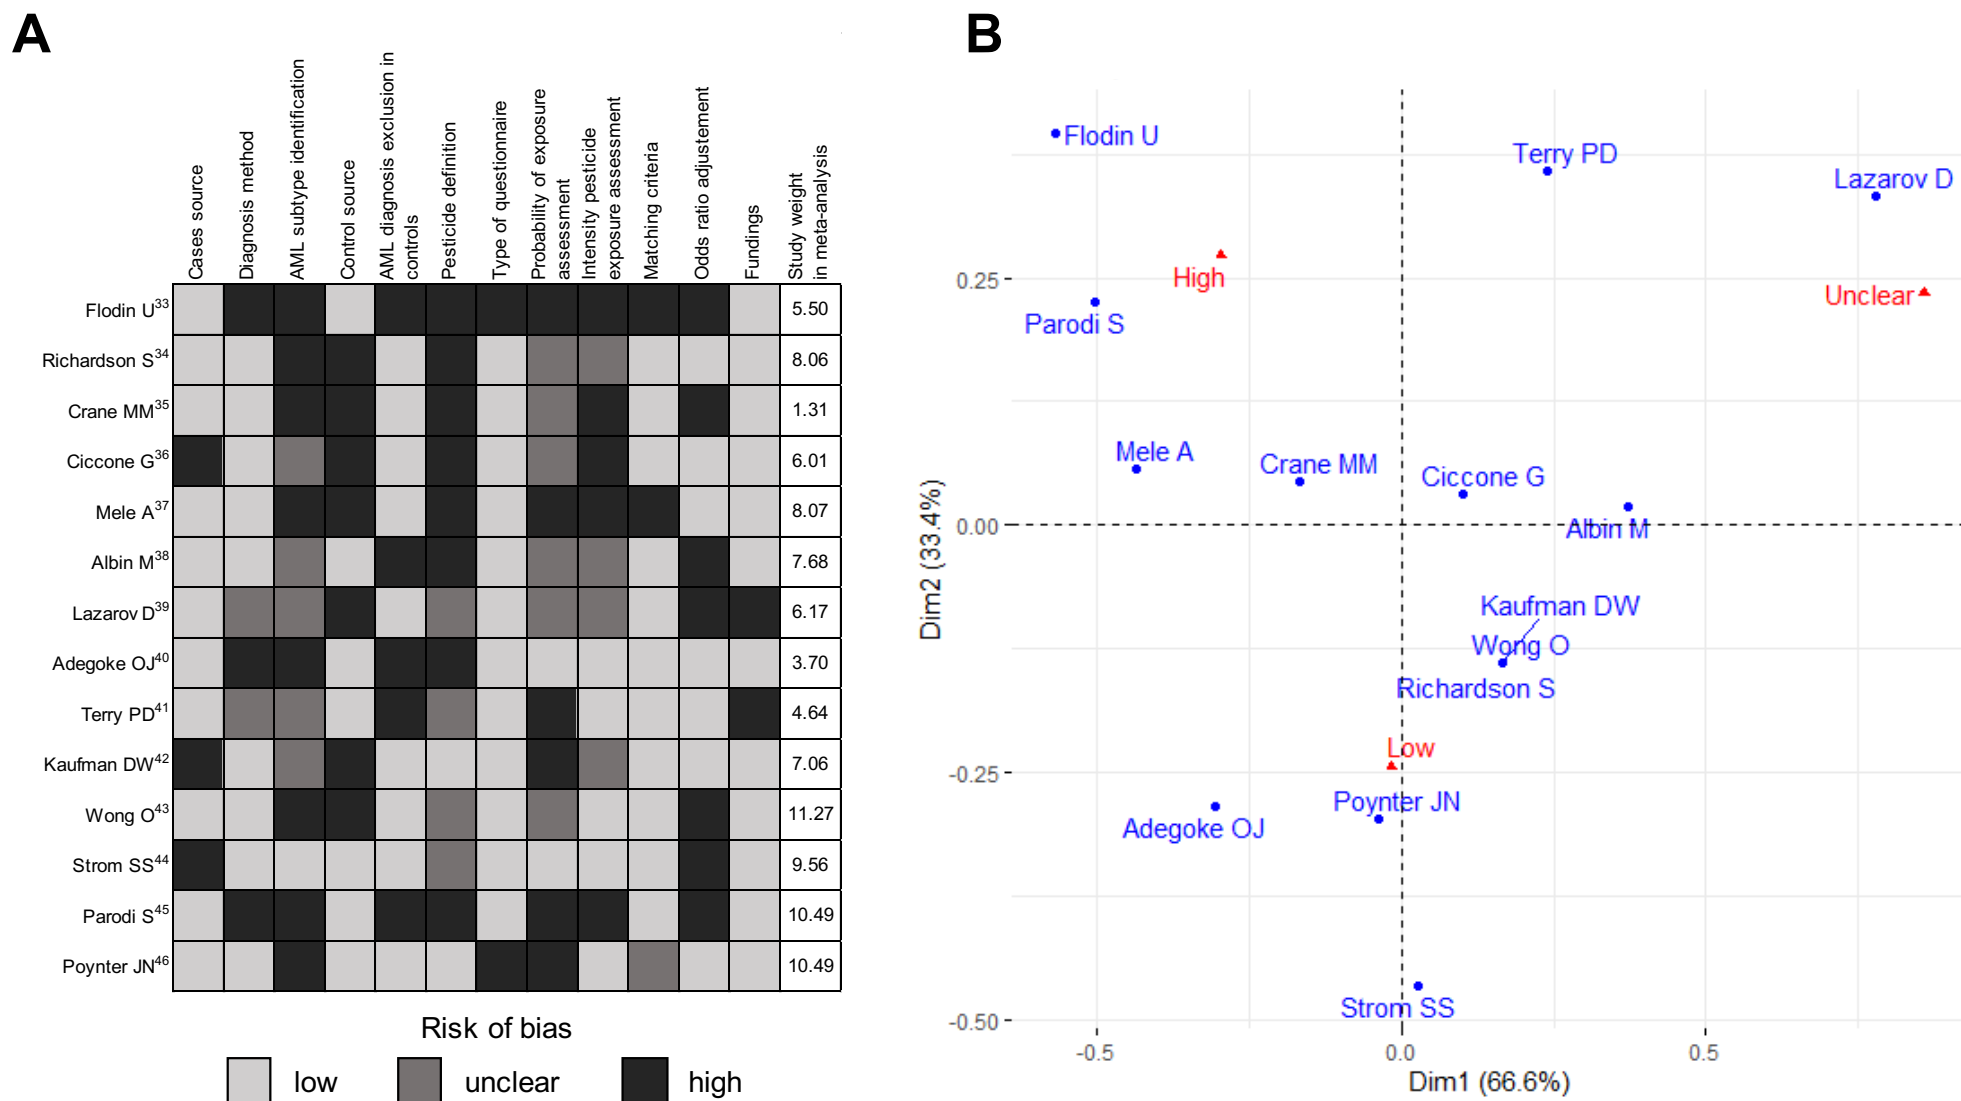

(A) Each study was assessed with three levels of risk of bias (low, unclear and high, Table S1). The weight of studies in the overall meta-analysis is represented. (B) Using the distribution of low, unclear and high risk (red) among each study included (blue), a correspondence analysis was performed to identify groups of studies according to the risk of bias.



Fig S4. Outlier studies identification with Q-Q plot.

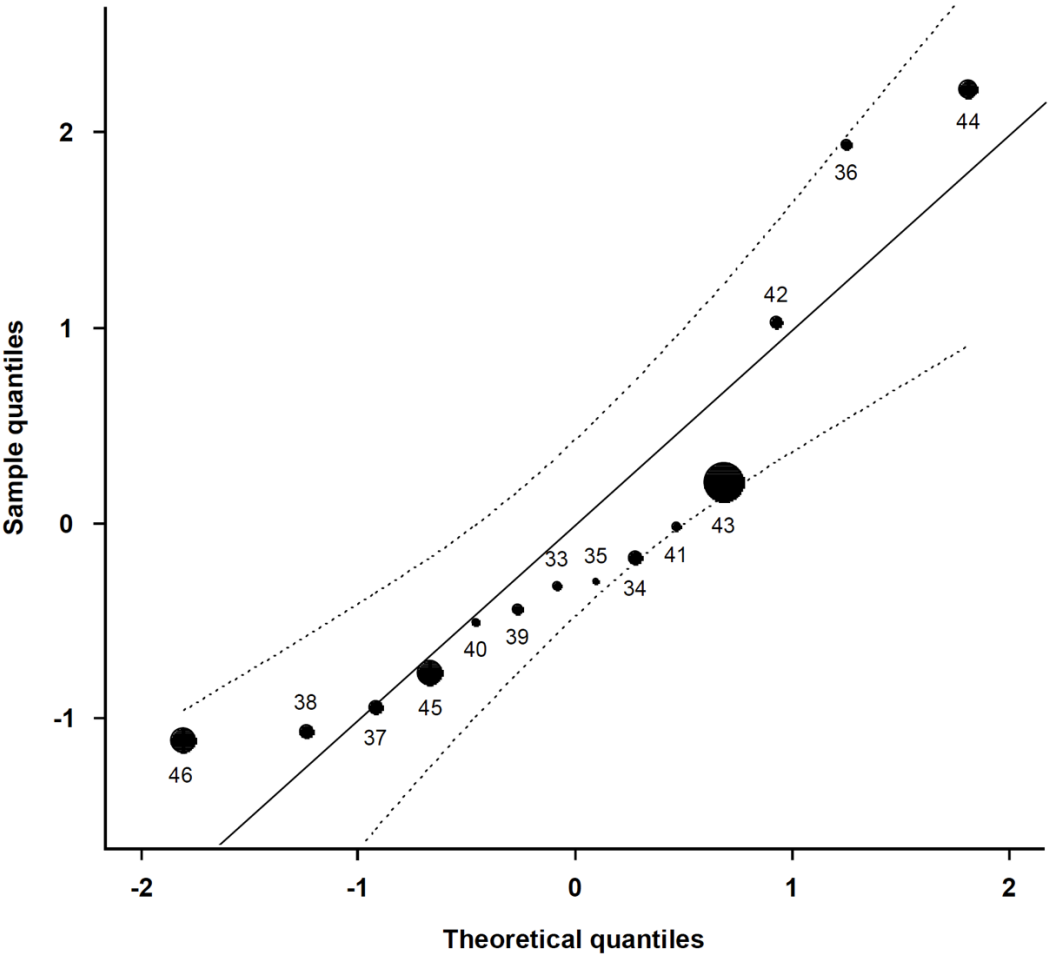

Studies are identified by their position in the reference list. The plot size is proportional to the weight of each study is the pooled odds ratios.

**Fig S5. Frequency of acute myeloid leukemia over time together with pesticide usage in the USA.**

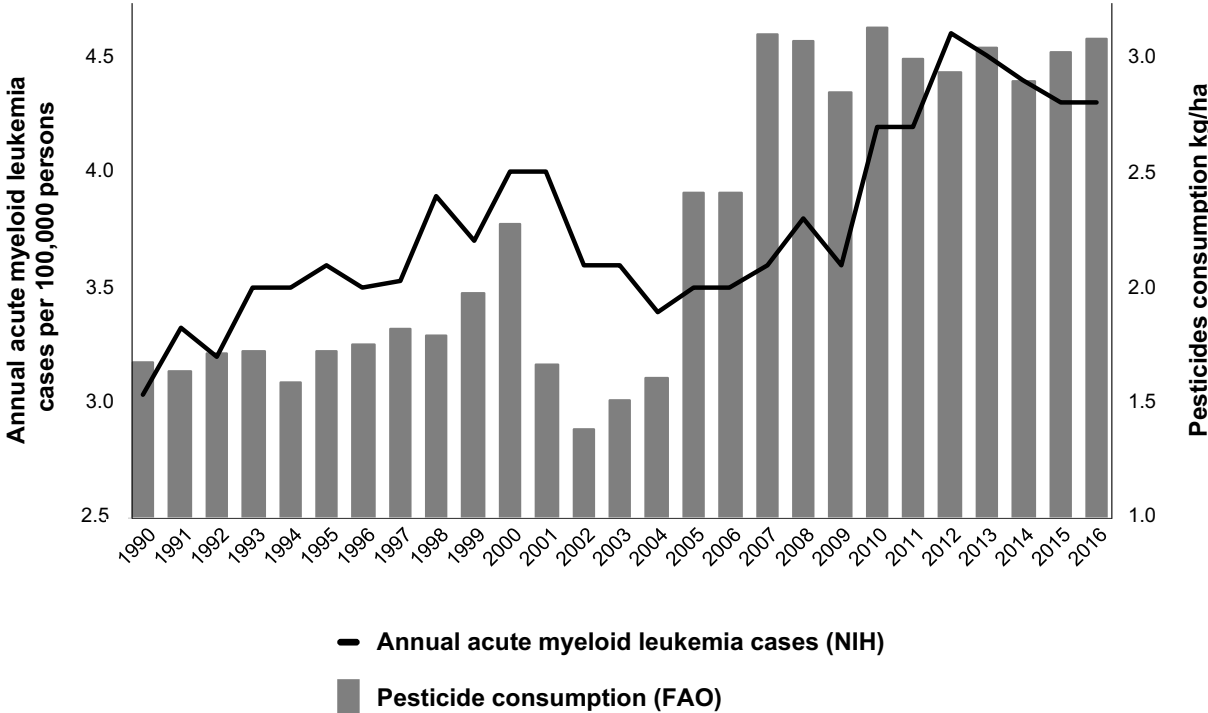

Pesticide use in kg/ha in the USA since 1990 according to the Food and Agriculture Organization (FAO)  
 New cases of AML per 100,000 persons according to the national institute of health (NIH).

We compared available USA data from the FAO and National Institute of Health (NIH) on the annual incidence of AML and concomitant consumption of pesticides since 1990. This disclosed a weak positive correlation between these two variables through linear regression analysis ( $R^2=0.42$ ).

NIH data available at:  
[https://seer.cancer.gov/csr/1975\\_2016/browse\\_csr.php?sectionSEL=13&pageSEL=sect\\_13\\_table.08](https://seer.cancer.gov/csr/1975_2016/browse_csr.php?sectionSEL=13&pageSEL=sect_13_table.08)

FAO data available at:  
<http://www.fao.org/faostat/en/#data/EP/visualize>
